# Supplementary material for: COVID-19: Focusing on the Link between Inflammation, Vitamin D, MAPK Pathway and Oxidative Stress Genetics
Source: MDPI journal article supplement (doi:10.3390/antiox12051133), 2023-05-20
Supplement: s1 [file s1]

**Table S1.** Influence of genetic variants on ventilation type according to age.

|                    | <65 years (0)  |         |           |       |            |            |                                                                    | >65 years (1)  |         |           |       |            |            |                                                                    |
|--------------------|----------------|---------|-----------|-------|------------|------------|--------------------------------------------------------------------|----------------|---------|-----------|-------|------------|------------|--------------------------------------------------------------------|
|                    | No oxygenation | Cannula | Reservoir | CPAP  | Intubation | Ventilator | No oxygenation vs. Cannula/Ventilator vs. NIV/Intubation/Reservoir | No oxygenation | Cannula | Reservoir | CPAP  | Intubation | Ventilator | No oxygenation vs. Cannula/Ventilator vs. NIV/Intubation/Reservoir |
| IL-6 597 GA/AA     |                | 0.048   |           |       |            |            |                                                                    |                |         |           |       |            |            |                                                                    |
| IL-6 597 AA        |                |         |           |       |            | 0.046      |                                                                    |                |         |           |       |            |            |                                                                    |
| IL-28 275 GA/AA    |                |         |           |       |            |            |                                                                    | 0.046          |         |           |       |            | 0.038      |                                                                    |
| IL-28 275 AA       | 0.030          | 0.048   |           |       |            |            |                                                                    |                |         |           |       |            |            |                                                                    |
| HAMP 582 GA/AA     | 0.006          |         |           |       |            |            | 0.010                                                              |                |         |           |       |            |            |                                                                    |
| HIF-1 438 AA       |                |         |           |       |            |            |                                                                    |                |         | <         |       |            |            |                                                                    |
| AKR1 CC            |                |         |           |       |            |            |                                                                    |                |         |           | 0.017 |            |            | 0.039                                                              |
| ACE 2350 AG/GG     |                |         | 0.018     |       |            |            |                                                                    | 0.029          |         |           |       |            |            | 0.034                                                              |
| IL-10 3575 AA      |                |         | 0.009     |       |            |            |                                                                    |                |         |           |       |            | 0.012      |                                                                    |
| MBL2 CG/GG         |                |         |           |       | 0.008      |            |                                                                    |                |         |           |       |            |            |                                                                    |
| NT5C2 153 TC/CC    |                |         |           |       |            |            |                                                                    | 0.011          |         |           |       |            |            | 0.039                                                              |
| NT5C2 CC           |                |         |           | 0.042 |            |            |                                                                    |                |         |           |       |            |            |                                                                    |
| NRP1 TC/CC         |                |         |           |       |            |            |                                                                    |                |         |           |       |            |            |                                                                    |
| IL-28 860 CC       | 0.023          |         |           |       |            |            |                                                                    |                |         |           |       |            |            |                                                                    |
| IL-28 917 GG       | 0.003          |         |           |       |            |            | 0.011                                                              |                |         | 0.003     |       |            |            |                                                                    |
| PXR 63396 TT       |                |         |           |       | 0.036      |            |                                                                    |                |         |           |       |            |            |                                                                    |
| CAR 540 CT/TT      |                |         |           |       | 0.035      |            |                                                                    |                |         |           |       |            |            |                                                                    |
| CYP24A1 3999 TC/CC | 0.047          |         | 0.019     |       |            |            |                                                                    |                |         |           | 0.004 |            |            |                                                                    |
| CYP24A1 3999 CC    |                |         |           |       |            |            |                                                                    | 0.046          |         |           |       |            |            |                                                                    |
| CYP24A1 8620 GG    |                |         |           |       |            |            |                                                                    | 0.026          |         |           |       |            |            |                                                                    |
| CYP24A1 8620 AG/GG | 0.048          |         |           |       |            |            |                                                                    |                |         |           | 0.009 |            |            |                                                                    |

|                      |  |  |       |           |       |  |  |       |       |       |  |  |       |       |
|----------------------|--|--|-------|-----------|-------|--|--|-------|-------|-------|--|--|-------|-------|
| CYP27A1 345<br>GG    |  |  |       |           |       |  |  |       | 0.009 |       |  |  |       | 0.039 |
| CYP27A1 345<br>AG/GG |  |  |       |           | 0.022 |  |  |       |       |       |  |  |       |       |
| CYP 2C8 681<br>CT/TT |  |  |       |           |       |  |  |       |       | 0.011 |  |  |       |       |
| CYP27B1+28<br>38 TT  |  |  |       | 0.03<br>2 |       |  |  |       |       |       |  |  |       |       |
| VEGF 2578<br>CC      |  |  |       |           |       |  |  |       | 0.009 |       |  |  |       |       |
| VEGF 2578<br>AC/CC   |  |  |       |           |       |  |  |       |       |       |  |  | 0.006 |       |
| VDR ApaI AA          |  |  |       |           |       |  |  | 0.026 |       | 0.026 |  |  |       |       |
| VDR TaqI CC          |  |  |       |           |       |  |  |       |       | 0.003 |  |  |       |       |
| VCAM1<br>TC/CC       |  |  |       |           | 0.036 |  |  |       |       | 0.026 |  |  |       |       |
| MAU 2 GG             |  |  | 0.018 |           |       |  |  |       |       |       |  |  |       |       |
| RAF 931 CC           |  |  | 0.018 |           |       |  |  | 0.003 |       |       |  |  |       | 0.011 |
| ERK 966 CC           |  |  |       |           |       |  |  | 0.026 |       |       |  |  |       |       |

**Table S2.** Participant type of ventilation according to genetics and gender.

[illegible]
